# Supplementary material for: Direct intercalation of cisplatin into zirconium phosphate nanoplatelets for potential cancer nanotherapy
Source: Royal Society of Chemistry journal article supplement (doi:10.1039/c3nr02206d), 2013-01-01
Supplement: c3nr02206d.pdf [file c3nr02206d.pdf]

## Direct Intercalation of Cisplatin into Zirconium Phosphate Nanoplatelets for Potential Cancer Nanotherapy

Agustín Díaz,<sup>a,b</sup> Millie L. González,<sup>c</sup> Riviam J. Pérez,<sup>a</sup> Amanda David,<sup>a,b</sup> Atashi Mukherjee,<sup>b</sup>  
Adriana Báez,<sup>c</sup> Abraham Clearfield<sup>b</sup> and Jorge L. Colón<sup>\*a</sup>

a) Department of Chemistry, University of Puerto Rico, PO Box 23346, Río Piedras, PR  
00931-3346, USA.

b) Department of Chemistry, Texas A&M University, PO Box 30012, College Station, TX  
77842-3012, USA.

c) Departments of Pharmacology and Otolaryngology, School of Medicine, University of  
Puerto Rico, PO Box 365067, San Juan, PR 00936-5067, USA.

### Supporting Information:

#### Page – S2:

**Fig. S1:** Diffuse reflectance spectra of  $\alpha$ -ZrP and of the intercalation products of the reaction of ZrP and cisplatin at several cisplatin:ZrP molar ratios.

#### Page – S3:

**Fig. S2:** <sup>31</sup>P MAS-NMR spectra of cisplatin intercalated ZrP at 5:1, 1:1, 1:5, 1:10, and 1:20 cisplatin:ZrP molar ratios.

#### Page – S4:

**Table S1:** Percentage of viable and early apoptotic MCF-7 cells analyzed by flow cytometry with annexin V-FITC/PI double staining after 48-h exposure to ZrP and cisplatin@ZrP(1:1)

#### Page – S5:

**Fig. S3:** Flow cytometric analysis of the cell cycle of untreated control MCF-7 cells at 24 hours (A), and 48 hours (C), ZrP (10  $\mu$ M) treated cells after 24 hours (B) and 48 hours (D) of exposure

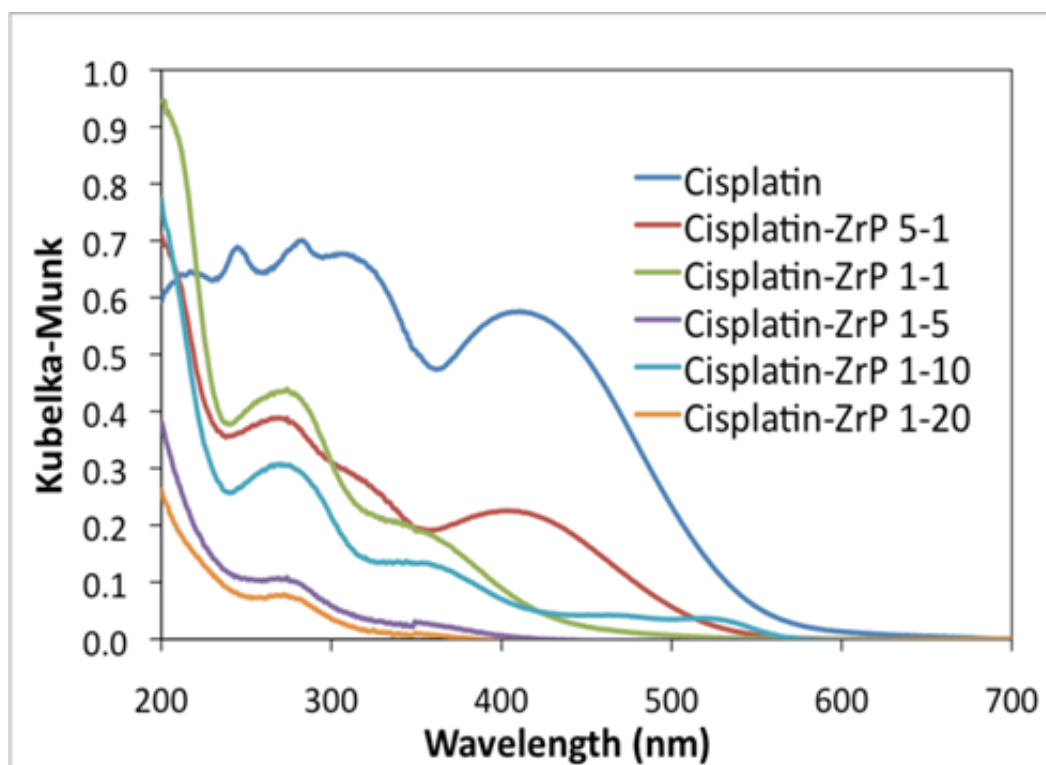

**Fig. S1.** Diffuse reflectance spectra of  $\alpha$ -ZrP and of the intercalation products of the reaction of ZrP and cisplatin at several cisplatin:ZrP molar ratios.

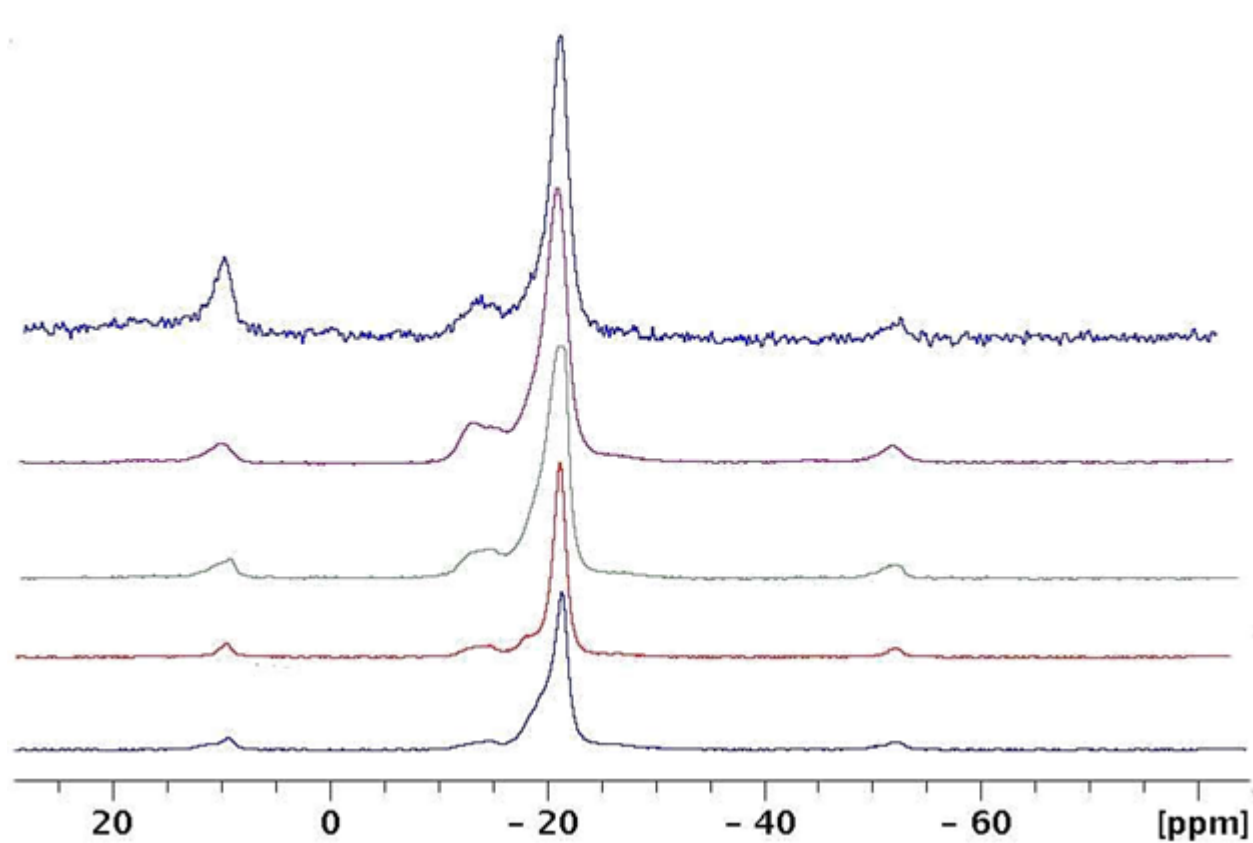

**Fig. S2:**  $^{31}\text{P}$  MAS-NMR spectra of cisplatin intercalated ZrP at 5:1, 1:1, 1:5, 1:10, and 1:20 cisplatin:ZrP molar ratios.

**Table S1:** Percentage of viable and early apoptotic MCF-7 cells analyzed by flow cytometry with annexin V-FITC/PI double staining after 48-h exposure to ZrP and cisplatin@ZrP(1:1)

| Parameter                       | Percentage                             |                                                 |
|---------------------------------|----------------------------------------|-------------------------------------------------|
|                                 | Viable cells<br>Annexin V (-) / PI (-) | Early apoptotic cells<br>Annexin V (+) / PI (-) |
| Control                         | 51.2                                   | 11.7                                            |
| ZrP                             | 44.4                                   | 17.2                                            |
| cisplatin@ZrP (1:1 molar ratio) | 32.6                                   | 30.5                                            |

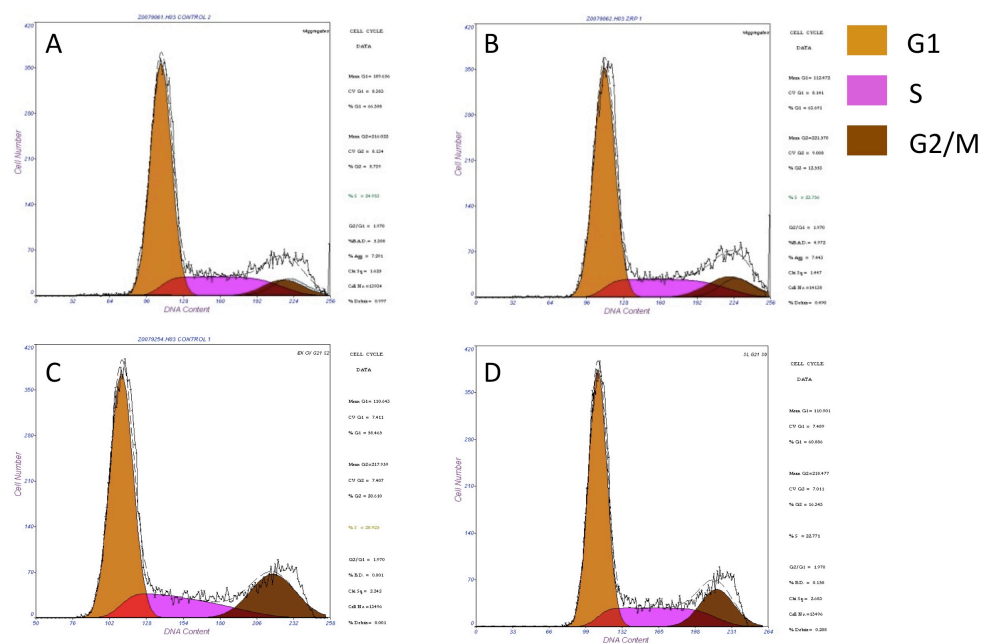

**Fig. S3.** Flow cytometric analysis of the cell cycle of untreated control MCF-7 cells at 24 hours (A), and 48 hours (C). ZrP (10  $\mu$ M) treated cells after 24 hours (B) and 48 hours (D) of exposure.
